# Supplementary material for: Chemical and Microbial Leaching of Valuable Metals from PCBs and Tantalum Capacitors of Spent Mobile Phones
Source: MDPI journal article supplement (doi:10.3390/ijerph191610006), 2022-08-13
Supplement: s1 [file s1]

**Supporting Documents:**

# **Chemical and Microbial Leaching of Valuable Metals from PCBs and Tantalum Capacitors of Spent Mobile Phones**

**Asma Sikander <sup>1,2</sup>, Steven Kelly <sup>3</sup>, Kerstin Kuchta <sup>4</sup>, Anika Sievers <sup>1</sup>, Thomas Willner <sup>1</sup> and Andrew S. Hursthouse <sup>2,\*</sup>**

<sup>1</sup> Department of Process Engineering, Hamburg University of Applied Sciences, Ulmenliet 20,  
21033 Hamburg, Germany

<sup>2</sup> School of Computing, Engineering & Physical Sciences, University of the West of the Scotland,  
Scotland PA1 2BE, UK

<sup>3</sup> School of Health Life Sciences, University of the West of Scotland, Scotland G72 0LH, UK

<sup>4</sup> Institute for Environmental Engineering and Energy Economics, TUHH—Hamburg University of  
Technology, D-21079 Hamburg, Germany

\* Correspondence: [andrew.hursthouse@uws.ac.uk](mailto:andrew.hursthouse@uws.ac.uk); Tel.: +44-1418483213

**S-1. Chemical composition of waste PCBs and tantalum capacitors (VICs) without HF**  
**Precious Metals**

| Sample    | Au (208.207 nm) |      |                | Pd (265.945 nm) |      |                | Ag (328.068 nm) |       |                | Ta (263.558 nm) |      |                |
|-----------|-----------------|------|----------------|-----------------|------|----------------|-----------------|-------|----------------|-----------------|------|----------------|
|           | mg/L            | g/kg | Avg.<br>(g/kg) | mg/L            | g/kg | Avg.<br>(g/kg) | mg/L            | g/kg  | Avg.<br>(g/kg) | mg/L            | g/kg | Avg.<br>(g/kg) |
| PCB-0.75a | 1.61            | 0.40 | 0.4            | 0.08            | 0.02 | 0.00           | 9.4             | 2.35  | 2.2            | 0.1             | 0.03 | 0.02           |
| PCB-0.75b | 1.47            | 0.37 |                | 0.06            | 0.02 |                | 8.4             | 2.10  |                | 0.09            | 0.02 |                |
| PCB-0.50a | 4.13            | 1.03 | 1.0            | 0.04            | 0.01 | 0.00           | 7.51            | 1.88  | 1.4            | 0.07            | 0.02 | 0.02           |
| PCB-0.5b  | 3.59            | 0.90 |                | 0.05            | 0.01 |                | 3.38            | 0.85  |                | 0.1             | 0.03 |                |
| PCB-0.25a | 4.56            | 1.14 | 1.2            | 0.13            | 0.03 | 0.00           | 8.51            | 2.13  | 1.8            | 0.04            | 0.01 | 0.01           |
| PCB-0.25b | 4.69            | 1.17 |                | 0.1             | 0.03 |                | 5.5             | 1.38  |                | 0.07            | 0.02 |                |
| Cap-0.75  | 1.01            | 0.51 | -              | 0.01            | 0.01 | -              | 29.9            | 14.95 | -              | 0.32            | 0.16 | -              |
| Cap-0.5   | 1.21            | 0.61 | -              | 0.02            | 0.01 | -              | 39.9            | 19.95 | -              | 0.22            | 0.11 | -              |

## S-2. Leaching with organic acids

| Sample               | Cu (327.395 nm) |                   | Fe (261.382 nm) |                   | Al (394.401 nm) |                   | Mn (257.610 nm) |                   | Ni (232.138 nm) |                   | Pb (283.305 nm) |                   | Zn (206.200 nm) |                   | Au (208.207 nm) |                   | Pd (340.458 nm) |                   | Ag (328.068 nm) |                   | Ta (268.517 nm) |                   |  |
|----------------------|-----------------|-------------------|-----------------|-------------------|-----------------|-------------------|-----------------|-------------------|-----------------|-------------------|-----------------|-------------------|-----------------|-------------------|-----------------|-------------------|-----------------|-------------------|-----------------|-------------------|-----------------|-------------------|--|
|                      | mg/L            | metal leached (%) |  |
| Citric Acid Leaching |                 |                   |                 |                   |                 |                   |                 |                   |                 |                   |                 |                   |                 |                   |                 |                   |                 |                   |                 |                   |                 |                   |  |
| PCBs                 | 14104.6         | 45.27             | 710.90          | 14.05             | 510.31          | 58.66             | 149.67          | 11.09             | 788.09          | 35.34             | 500.89          | 47.70             | 1591.0          | 45.33             | 0.01            | 0                 | u               | 0                 | 0.51            | 0.23              | u               | 0                 |  |
| Ta.Cap               | 2307.89         | 43.14             | 667.13          | 23.24             | 189.86          | 48.68             | 1743.6          | 21.19             | 645.65          | 45.15             | 443.45          | 31.68             | 267.34          | 43.12             | u               | 0                 | u               | 0                 | 3.1             | 0.21              | u               | 0                 |  |
| Oxalic Acid Leaching |                 |                   |                 |                   |                 |                   |                 |                   |                 |                   |                 |                   |                 |                   |                 |                   |                 |                   |                 |                   |                 |                   |  |
| PCBs                 | 4869.7          | 15.63             | 401.71          | 7.94              | 168.52          | 19.37             | 59.43           | 4.40              | 250.81          | 11.25             | 34.87           | 3.32              | 69.63           | 1.98              | u               | 0                 | u               | 0                 | 0.1             | 0.05              | u               | 0                 |  |
| Ta.Cap               | 1122.45         | 20.98             | 272.01          | 9.48              | 49.61           | 12.72             | 321.54          | 3.91              | 329.45          | 23.04             | 96.61           | 6.90              | 26.01           | 4.20              | u               | 0                 | u               | 0                 | u               | 0                 | u               | 0                 |  |

## S-3. Leaching with inorganic acids

| Sample                 | Cu (327.395 nm) |                   | Fe (261.382 nm) |                   | Al (394.401 nm) |                   | Mn(257.610 nm) |                   | Ni (232.138 nm) |                   | Pb (283.305 nm) |                   | Zn (206.200 nm) |                   | Au (208.207 nm) |                   | Pd (340.458 nm) |                   | Ag (328.068 nm) |                   | Ta (268.517 nm) |                   |  |
|------------------------|-----------------|-------------------|-----------------|-------------------|-----------------|-------------------|----------------|-------------------|-----------------|-------------------|-----------------|-------------------|-----------------|-------------------|-----------------|-------------------|-----------------|-------------------|-----------------|-------------------|-----------------|-------------------|--|
|                        | mg/L            | metal leached (%) | mg/L            | metal leached (%) | mg/L            | metal leached (%) | mg/L           | metal leached (%) | mg/L            | metal leached (%) | mg/L            | metal leached (%) | mg/L            | metal leached (%) | mg/L            | metal leached (%) | mg/L            | metal leached (%) | mg/L            | metal leached (%) | mg/L            | metal leached (%) |  |
| Sulfuric Acid Leaching |                 |                   |                 |                   |                 |                   |                |                   |                 |                   |                 |                   |                 |                   |                 |                   |                 |                   |                 |                   |                 |                   |  |
| PCBs-0.75              | 30399.94        | 97.56             | 3464.89         | 68.48             | 670.11          | 77.02             | 651.85         | 48.29             | 1680.32         | 75.35             | 49.33           | 4.70              | 3071.65         | 87.51             | 0.05            | 0.13              | u               | 0                 | 0.91            | 0.41              | u               | 0                 |  |
| Nitric Acid Leaching   |                 |                   |                 |                   |                 |                   |                |                   |                 |                   |                 |                   |                 |                   |                 |                   |                 |                   |                 |                   |                 |                   |  |
| PCBs-0.75              | 29709.62        | 95.35             | 3909.76         | 77.27             | 685.11          | 78.75             | 856.34         | 63.43             | 1498.45         | 67.20             | 267.21          | 25.45             | 2991.65         | 85.23             | 0.45            | 1.13              | u               | 0                 | 121.9           | 55.41             | 0.04            | 1.30              |  |

#### S-4. Bacterial leaching of PCBs varying pulp density

| Sample           | Cu (224.700 nm) |                   | Fe (259.940 nm) |                   | Al (309.271 nm) |                   | Mn (260.568 nm) |                   | Ni (230.078 nm) |                   | Pb (283.305 nm) |                   | Zn (210.442 nm) |                   | Au (208.207 nm) |                   | Pd (340.458 nm) |                   | Ag (338.068 nm) |                   | Ta (263.558 nm) |                   |
|------------------|-----------------|-------------------|-----------------|-------------------|-----------------|-------------------|-----------------|-------------------|-----------------|-------------------|-----------------|-------------------|-----------------|-------------------|-----------------|-------------------|-----------------|-------------------|-----------------|-------------------|-----------------|-------------------|
|                  | mg/L            | metal leached (%) |
| Pulp Density 2%  |                 |                   |                 |                   |                 |                   |                 |                   |                 |                   |                 |                   |                 |                   |                 |                   |                 |                   |                 |                   |                 |                   |
| PCBs             | 6025.36         | 96.68             | 899.1           | 88.84             | 121.9           | 70.06             | 120.9           | 43                | 440.66          | 98.8              | 1.69            | 0.80              | 541.22          | 77.10             | 0.07            | 0.88              | u               | 0                 | 0.05            | 0.1               | u               | 0                 |
| Pulp Density 7%  |                 |                   |                 |                   |                 |                   |                 |                   |                 |                   |                 |                   |                 |                   |                 |                   |                 |                   |                 |                   |                 |                   |
| PCBs             | 19700.12        | 90.32             | 2788.67         | 78.73             | 399.99          | 65.68             | 289.78          | 30.66             | 1372.88         | 87.95             | 4.59            | 0.62              | 1703.64         | 69.34             | 0.05            | 0.18              | u               | 0                 | 0.1             | 0.06              | u               | 0                 |
| Pulp Density 10% |                 |                   |                 |                   |                 |                   |                 |                   |                 |                   |                 |                   |                 |                   |                 |                   |                 |                   |                 |                   |                 |                   |
| PCBs             | 26990.65        | 86.62             | 3659.34         | 72.32             | 509.88          | 58.61             | 399.69          | 29.61             | 1870.77         | 83.89             | 8.7             | 0.83              | 2304.9          | 65.67             | u               | 0                 | u               | 0                 | 0.14            | 0.06              | u               | 0                 |

#### S-5. Bacterial leaching of PCBs varying ferrous iron concentration

| Sample                        | Cu (224.700 nm) |                   | Fe (259.940 nm) |                   | Al (309.271 nm) |                   | Mn(260.568 nm) |                   | Ni (230.078 nm) |                   | Pb (283.305 nm) |                   | Zn (210.442 nm) |                   | Au (208.207 nm) |                   | Pd (340.458 nm) |                   | Ag (338.068 nm) |                   | Ta (263.558 nm) |                   |
|-------------------------------|-----------------|-------------------|-----------------|-------------------|-----------------|-------------------|----------------|-------------------|-----------------|-------------------|-----------------|-------------------|-----------------|-------------------|-----------------|-------------------|-----------------|-------------------|-----------------|-------------------|-----------------|-------------------|
|                               | mg/L            | metal leached (%) | mg/L            | metal leached (%) | mg/L            | metal leached (%) | mg/L           | metal leached (%) | mg/L            | metal leached (%) | mg/L            | metal leached (%) | mg/L            | metal leached (%) | mg/L            | metal leached (%) | mg/L            | metal leached (%) | mg/L            | metal leached (%) | mg/L            | metal leached (%) |
| Ferrous Iron Concentration 1g |                 |                   |                 |                   |                 |                   |                |                   |                 |                   |                 |                   |                 |                   |                 |                   |                 |                   |                 |                   |                 |                   |
| PCBs                          | 5190.09         | 83.28             | 658.66          | 65.08             | 78.65           | 45.20             | 81.44          | 30.16             | 431.65          | 96.78             | 1.75            | 0.83              | 382.09          | 54.43             | 0.04            | 0.5               | u               | 0                 | 0.15            | 0.34              | u               | 0                 |
| Ferrous Iron Concentration 3g |                 |                   |                 |                   |                 |                   |                |                   |                 |                   |                 |                   |                 |                   |                 |                   |                 |                   |                 |                   |                 |                   |
| PCBs                          | 5379.09         | 86.31             | 779.09          | 76.99             | 101.01          | 58.05             | 82.01          | 30.37             | 409.76          | 91.87             | 1.81            | 0.86              | 399.01          | 56.84             | 0.03            | 0.38              | u               | 0                 | 0.21            | 0.48              | u               | 0                 |
| Ferrous Iron Concentration 5g |                 |                   |                 |                   |                 |                   |                |                   |                 |                   |                 |                   |                 |                   |                 |                   |                 |                   |                 |                   |                 |                   |
| PCBs                          | 5781.99         | 92.78             | 802.98          | 79.35             | 103.45          | 59.45             | 88.99          | 32.96             | 425.77          | 95.46             | 1.79            | 0.85              | 419.65          | 59.78             | 0.03            | 0.40              | u               | 0                 | 0.28            | 0.64              | u               | 0                 |
| Ferrous Iron Concentration 7g |                 |                   |                 |                   |                 |                   |                |                   |                 |                   |                 |                   |                 |                   |                 |                   |                 |                   |                 |                   |                 |                   |
| PCBs                          | 5899.44         | 94.66             | 831.45          | 82.16             | 109.99          | 63.21             | 113.09         | 41.89             | 430.21          | 96.46             | 1.77            | 0.84              | 439.68          | 62.63             | 0.04            | 0.50              | u               | 0                 | 0.31            | 0.70              | u               | 0                 |

## S-6. Bacterial leaching of PCBs and tantalum capacitor scrap varying particle size

| Sample               | Cu (327.395 nm) |                   | Fe (261.382 nm) |                   | Al (394.401 nm) |                   | Mn (257.610 nm) |                   | Ni (232.138 nm) |                   | Pb (283.305 nm) |                   | Zn (206.200 nm) |                   | Au (208.207 nm) |                   | Pd (340.458 nm) |                   | Ag (328.068 nm) |                   | Ta (268.517 nm) |                   |  |
|----------------------|-----------------|-------------------|-----------------|-------------------|-----------------|-------------------|-----------------|-------------------|-----------------|-------------------|-----------------|-------------------|-----------------|-------------------|-----------------|-------------------|-----------------|-------------------|-----------------|-------------------|-----------------|-------------------|--|
|                      | mg/L            | metal leached (%) |  |
| Particle Size 0.5mm  |                 |                   |                 |                   |                 |                   |                 |                   |                 |                   |                 |                   |                 |                   |                 |                   |                 |                   |                 |                   |                 |                   |  |
| PCBs                 | 5409.54         | 86.80             | 782.19          | 77.29             | 96.76           | 55.61             | 102.67          | 38.03             | 397.09          | 89.03             | 6.00            | 2.86              | 411.09          | 58.56             | 0.05            | 0.60              | u               | 0                 | 0.09            | 0.20              | u               | 0                 |  |
| Ta.Cap               | 941.99          | 88.04             | 446.98          | 77.87             | 58.98           | 75.62             | 945.99          | 57.47             | 235.77          | 82.44             | 26.79           | 9.57              | 71.65           | 57.78             | u               | 0                 | u               | 0                 | 0.66            | 0.23              | u               | 0                 |  |
| Particle Size 0.75mm |                 |                   |                 |                   |                 |                   |                 |                   |                 |                   |                 |                   |                 |                   |                 |                   |                 |                   |                 |                   |                 |                   |  |
| PCBs                 | 5098.45         | 81.81             | 739.02          | 73.03             | 81.92           | 47.08             | 96.03           | 35.57             | 369.67          | 82.89             | 5.03            | 2.40              | 390.08          | 55.57             | 0.03            | 0.38              | u               | 0                 | 0.02            | 0.05              | u               | 0                 |  |
| Ta.Cap               | 891.65          | 83.33             | 423.08          | 73.71             | 53.02           | 67.97             | 837.6           | 50.89             | 220.04          | 76.94             | 16.06           | 5.74              | 68.67           | 55.38             | u               | 0                 | u               | 0                 | 0.16            | 0.05              | u               | 0                 |  |

## S-7. Fungal leaching of metals by A.Niger spores and filtrate

| Sample                                     | Cu (327.395 nm) |                   | Fe (261.382 nm) |                   | Al (394.401 nm) |                   | Mn(257.610 nm) |                   | Ni (232.138 nm) |                   | Pb (283.305 nm) |                   | Zn (206.200 nm) |                   | Au (208.207 nm) |                   | Pd (340.458 nm) |                   | Ag (328.068 nm) |                   | Ta (268.517 nm) |                   |
|--------------------------------------------|-----------------|-------------------|-----------------|-------------------|-----------------|-------------------|----------------|-------------------|-----------------|-------------------|-----------------|-------------------|-----------------|-------------------|-----------------|-------------------|-----------------|-------------------|-----------------|-------------------|-----------------|-------------------|
|                                            | mg/L            | metal leached (%) | mg/L            | metal leached (%) | mg/L            | metal leached (%) | mg/L           | metal leached (%) | mg/L            | metal leached (%) | mg/L            | metal leached (%) | mg/L            | metal leached (%) | mg/L            | metal leached (%) | mg/L            | metal leached (%) | mg/L            | metal leached (%) | mg/L            | metal leached (%) |
| Fungal leaching by <i>A.Niger</i> spores   |                 |                   |                 |                   |                 |                   |                |                   |                 |                   |                 |                   |                 |                   |                 |                   |                 |                   |                 |                   |                 |                   |
| PCBs                                       | 579.40          | 9.30              | 114.34          | 11.30             | 33.09           | 19.02             | 1.2            | 0.44              | 57.87           | 12.98             | 1.4             | 0.67              | 34.14           | 4.86              | u               | 0                 | u               | 0                 | 0.02            | 0.05              | u               | 0                 |
| Ta.Cap                                     | 14.01           | 1.31              | 5.99            | 1.04              | 2.95            | 3.78              | 51.09          | 3.10              | 21.76           | 7.61              | 4.99            | 1.78              | 3.46            | 2.79              | u               | 0                 | u               | 0                 | 0.19            | 0.06              | u               | 0                 |
| Fungal leaching by <i>A.Niger</i> filtrate |                 |                   |                 |                   |                 |                   |                |                   |                 |                   |                 |                   |                 |                   |                 |                   |                 |                   |                 |                   |                 |                   |
| PCBs                                       | 3219.65         | 51.66             | 300.66          | 29.71             | 129.91          | 74.66             | 12.9           | 4.78              | 276.1           | 61.91             | 44.65           | 21.26             | 243.40          | 34.67             | u               | 0                 | u               | 0                 | 0.12            | 0.27              | u               | 0                 |
| Ta.Cap                                     | 651.77          | 60.91             | 145.99          | 25.43             | 54.54           | 69.92             | 376.09         | 22.85             | 200.06          | 69.95             | 42.55           | 15.20             | 55.99           | 45.15             | u               | 0                 | u               | 0                 | 0.5             | 0.17              | u               | 0                 |
